# Supplementary material
Source: PubMed Central journal article supplement (PMC4024392)
Supplement: NIHMS578901-supplement-01.pdf [file NIHMS578901-supplement-01.pdf]

## Supplementary Table 1

### Stage-standardized age-specific 5-year relative survival of testicular tumors by histology in the U.S. for the years 2002-2006

|                       | Crude estimates |        | Standardized estimates |        |
|-----------------------|-----------------|--------|------------------------|--------|
|                       | RS (%)          | SE (%) | RS (%)                 | SE (%) |
| Classical seminoma    |                 |        |                        |        |
| 15-24                 | 97.2            | 1.2    | 98.4                   | 0.9    |
| 25-34                 | 98.5            | 0.5    | 98.5                   | 0.5    |
| 35-44                 | 98.4            | 0.5    | 98.3                   | 0.5    |
| 45+                   | 98.0            | 1.0    | 98.7                   | 0.9    |
| Mixed germ cell tumor |                 |        |                        |        |
| 15-24                 | 94.5            | 1.3    | 94.4                   | 1.3    |
| 25-34                 | 94.2            | 1.2    | 93.8                   | 1.3    |
| 35-44                 | 95.1            | 1.6    | 94.2                   | 1.7    |
| 45+                   | 88.9            | 3.6    | 91.6                   | 2.8    |
| Nonseminoma           |                 |        |                        |        |
| 15-24                 | 93.6            | 1.0    | 93.7                   | 1.0    |
| 25-34                 | 93.6            | 0.9    | 93.1                   | 0.9    |
| 35-44                 | 93.9            | 1.2    | 93.3                   | 1.2    |
| 45+                   | 87.6            | 2.9    | 90.4                   | 2.3    |
| Embryonal carcinoma   |                 |        |                        |        |
| 15-24                 | 98.2            | 1.4    | 98.1                   | 1.4    |
| 25-34                 | 98.6            | 1.1    | 98.3                   | 1.2    |
| 35+                   | 96.4            | 2.0    | 96.4                   | 1.9    |
| Malignant teratoma    |                 |        |                        |        |
| 15-24                 | 97.5            | 1.8    | 97.5                   | 1.8    |
| 25-34                 | 92.4            | 2.8    | 92.7                   | 2.4    |
| 35+                   | 88.8            | 4.6    | 92.1                   | 3.1    |
| Choriocarcinoma       |                 |        |                        |        |
| 15-24                 | 82.7            | 5.2    | 83.5                   | 4.7    |
| 25-34                 | 83.0            | 5.1    | 80.4                   | 5.2    |
| 35+                   | 77.3            | 7.1    | 81.3                   | 4.9    |
| Yolk sac tumor        |                 |        |                        |        |
| 15-24                 | 68.1            | 12.0   | 69.5                   | 8.7    |
| 25-34                 | 83.0            | 9.3    | 85.3                   | 7.2    |
| 35+                   | 89.0            | 8.7    | 87.3                   | 8.9    |

#### Legend

Nonseminoma excluding mixed germ cell tumors; the overall stage distribution within each histologic group provided the weights for standardization within age groups
